# Supplementary material for: Self-assembly synthesis of Ag@PANI nanocomposites as a tandem enzyme utilizing a highly efficient label-free SERS method to detect saccharides
Source: Royal Society of Chemistry journal article supplement (doi:10.1039/d0nj02073g), 2020-01-01
Supplement: d0nj02073g1.pdf [file d0nj02073g1.pdf]

## Supporting Information

### Self-assembly Synthesis of Ag@PANI Nanocomposites as the Tandem Enzyme Utilize a Highly Efficient Label-Free SERS Method to Detect Saccharides

Ru-Yi Tang, Lei Zhang, Yi-Jin Weng, Xue-Min Xia, Xia Zhang <sup>a\*</sup>

*School of Materials Engineering, Shanghai University of Engineering Science,  
Shanghai, 201620, China*

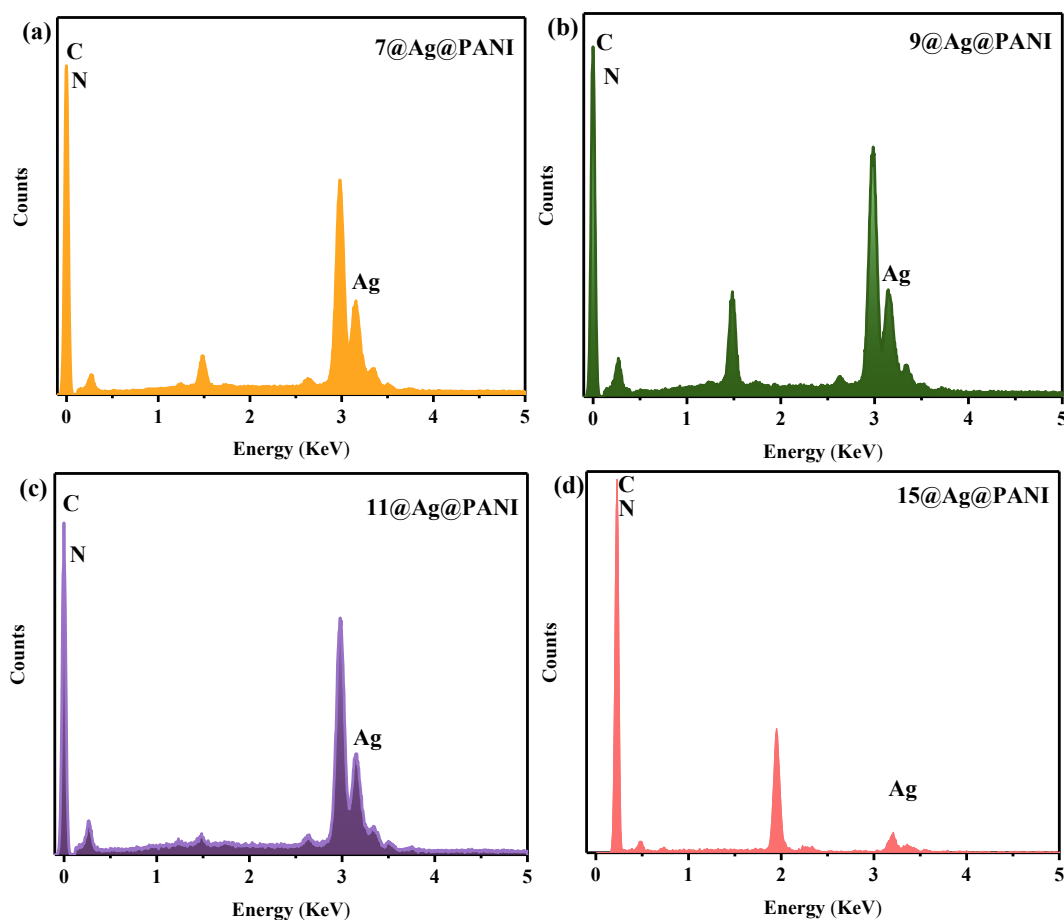

S. 1 EDS spectra of Ag@PANI

(a) 7@Ag@PANI; (b) 9@Ag@PANI; (c) 11@Ag@PANI; (d) 15@Ag@PANI

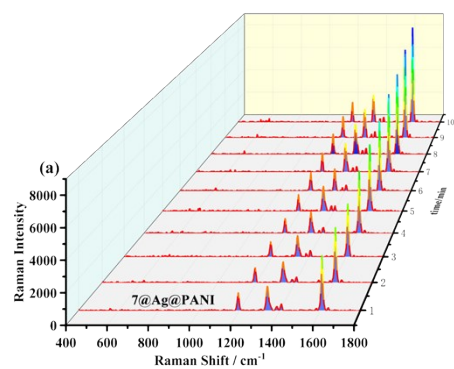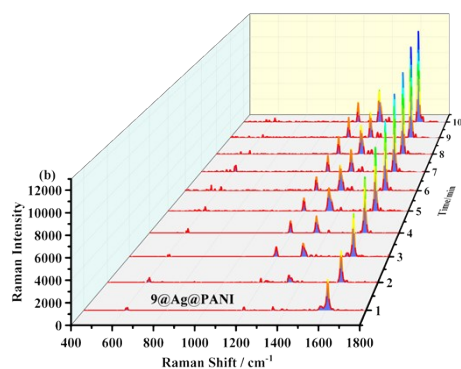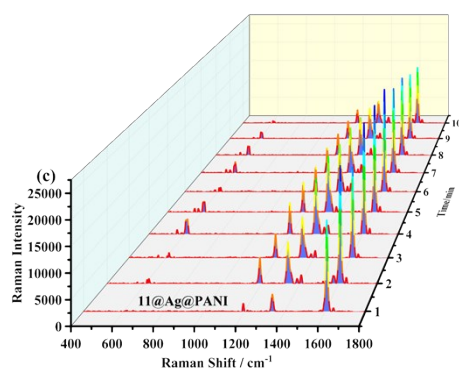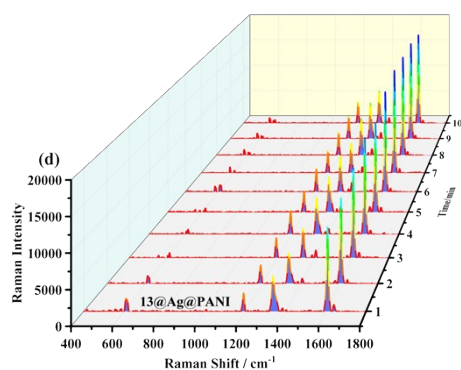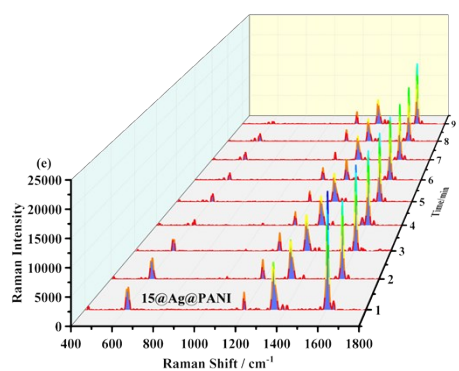

S. 2 SERS spectra of catalytic activity prepared at different concentrations of  $\text{Ag}^+$  with time

(a) 7@Ag@PANI; (b) 9@Ag@PANI; (c) 11@Ag@PANI; (d) 13@Ag@PANI; (e)

15@Ag@PANI
